# Supplementary figures and images for: circRNA Acbd6 promotes neural stem cell differentiation into cholinergic neurons via the miR-320-5p-Osbpl2 axis
Source: PubMed Central journal article supplement — J Biol Chem. 2022 Mar 17;298(4):101828. doi: 10.1016/j.jbc.2022.101828 (PMC9018392; doi:10.1016/j.jbc.2022.101828), 2022-03-17

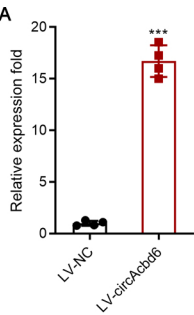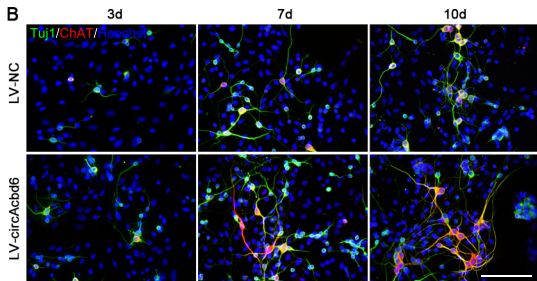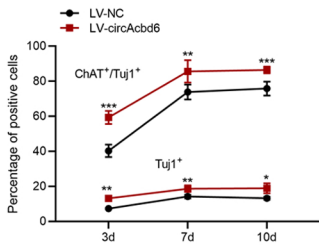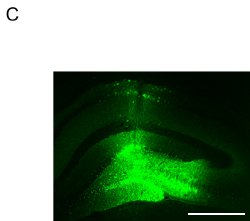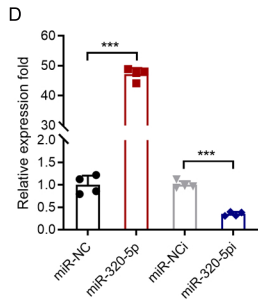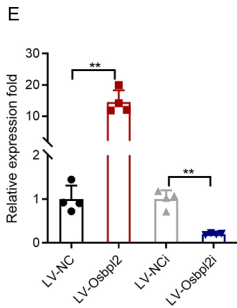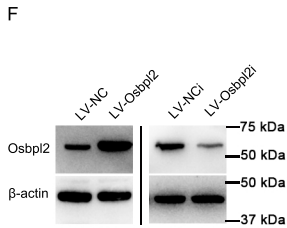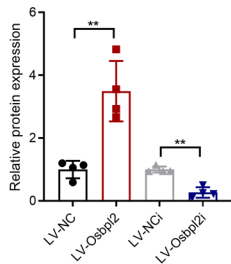

Supplement: mmc2.pdf [file mmc2.pdf]

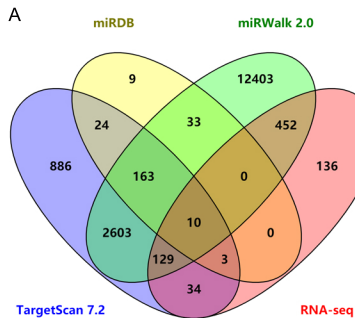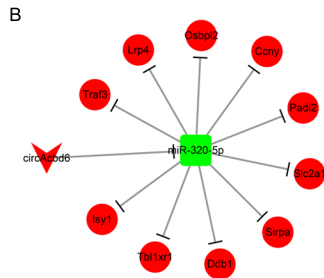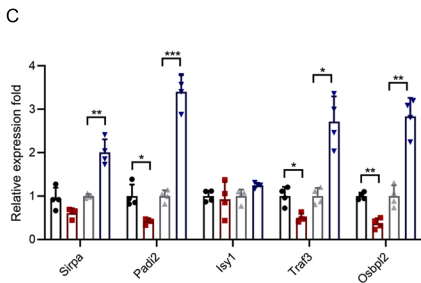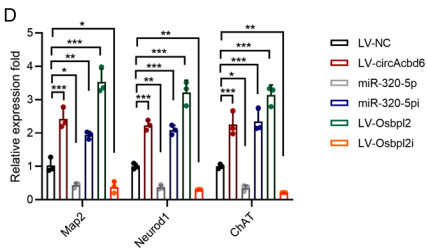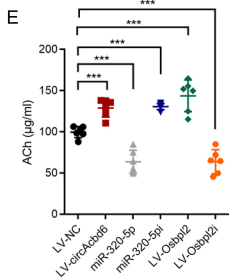

Supplement: mmc5.pdf [file mmc5.pdf]
